# Supplementary material for: A superhydrophilic “nanoglue” for stabilizing metal hydroxides onto carbon materials for high-energy and ultralong-life asymmetric supercapacitors
Source: Royal Society of Chemistry journal article supplement (doi:10.1039/c7ee01040k), 2017-01-01
Supplement: c7ee01040k1.pdf [file c7ee01040k1.pdf]

## Supporting Information

### Superhydrophilic “Nanoglue” Stabilizing the Metal Hydroxides onto Carbon Materials for High-Energy and Ultralong-Life Asymmetric Supercapacitors

Shaofeng Li,<sup>a</sup> Chang Yu,<sup>\*a</sup> Juan Yang,<sup>a</sup> Changtai Zhao,<sup>a</sup> Mengdi Zhang,<sup>a</sup> Huawei Huang,<sup>a</sup> Zhibin Liu,<sup>a</sup> Wei Guo,<sup>a</sup> and Jieshan Qiu<sup>\*a,b</sup>

<sup>a</sup>State Key Lab of Fine Chemicals, School of Chemical Engineering, Liaoning Key Lab for Energy Materials and Chemical Engineering, Dalian University of Technology, Dalian 116024, China. E-mail: [chang.yu@dlut.edu.cn](mailto:chang.yu@dlut.edu.cn); [jqu@dlut.edu.cn](mailto:jqu@dlut.edu.cn)

<sup>b</sup>School of Chemical Engineering and Technology, Xi'an Jiaotong University, Xi'an 710049, China. Email: [jasonqiu@xjtu.edu.cn](mailto:jasonqiu@xjtu.edu.cn)

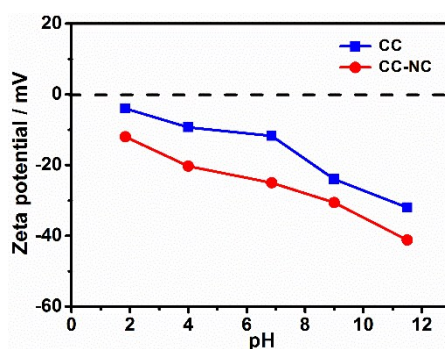

**Fig. S1** Surface charge variation of the CC and CC-NC samples at different pH values by zeta potential measurements.

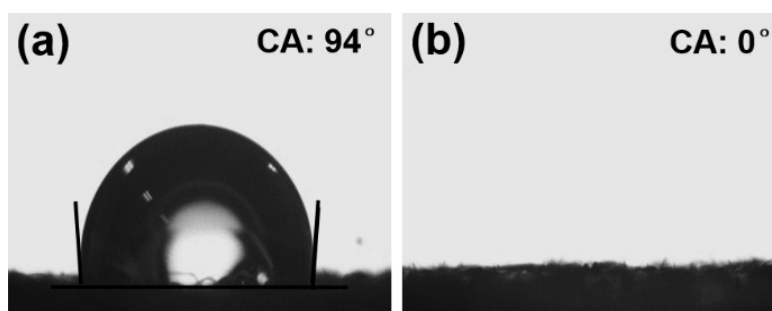

**Fig. S2** The contact angle of (a) CC-LDH and (b) CC-NC-LDH hybrids.

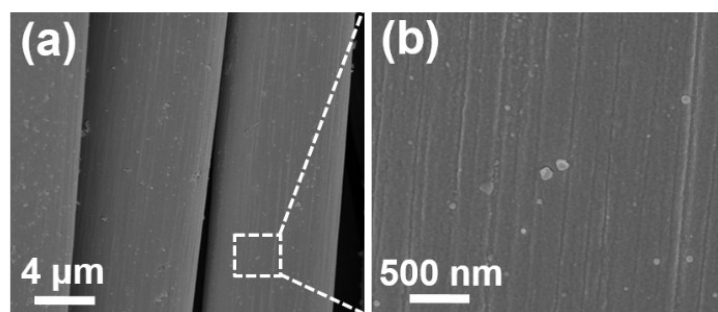

**Fig. S3** The typical FE-SEM images of the CC-P sample.

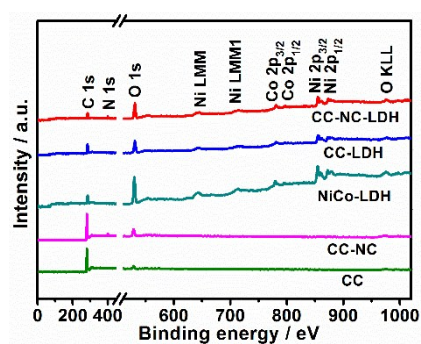

**Fig. S4** XPS survey spectra of CC, CC-NC, NiCo-LDH, CC-LDH and CC-NC-LDH samples.

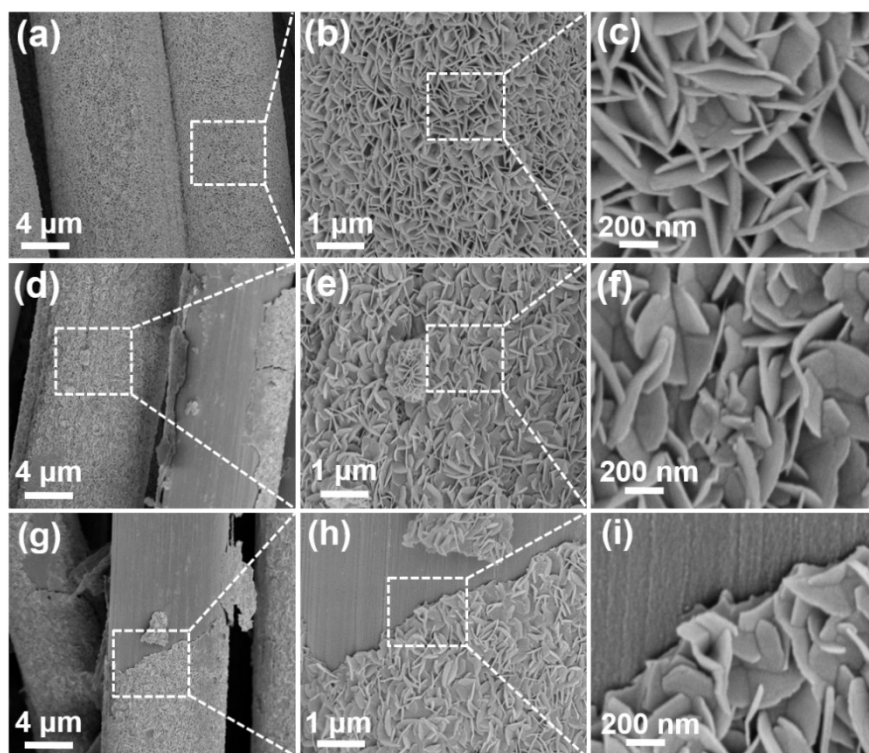

**Fig. S5** The typical FE-SEM images of (a-c) the CC-NC-LDH hybrids after 30 min sonication treatment; (d-f) the CC-HNO<sub>3</sub>-LDH without 30 min sonication treatment; and (g-i) the CC-HNO<sub>3</sub>-LDH after 30 min sonication treatment.

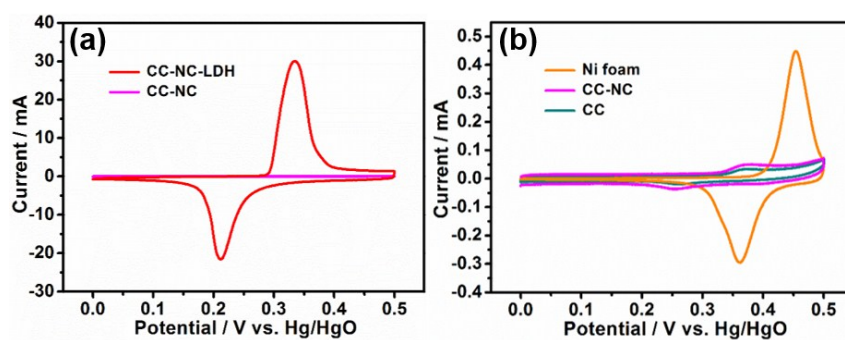

**Fig. S6** CV curves of the pristine CC, pristine Ni foam, CC-NC and CC-NC-LDH hybrid electrodes in a potential range of 0 to 0.5 V at a scan rate of 10 mV s<sup>-1</sup>.

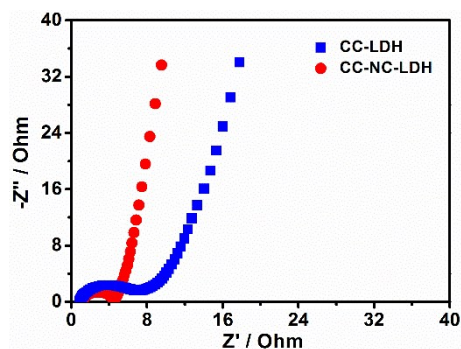

**Fig. S7** Nyquist plots of the CC-LDH and CC-NC-LDH hybrid electrodes.

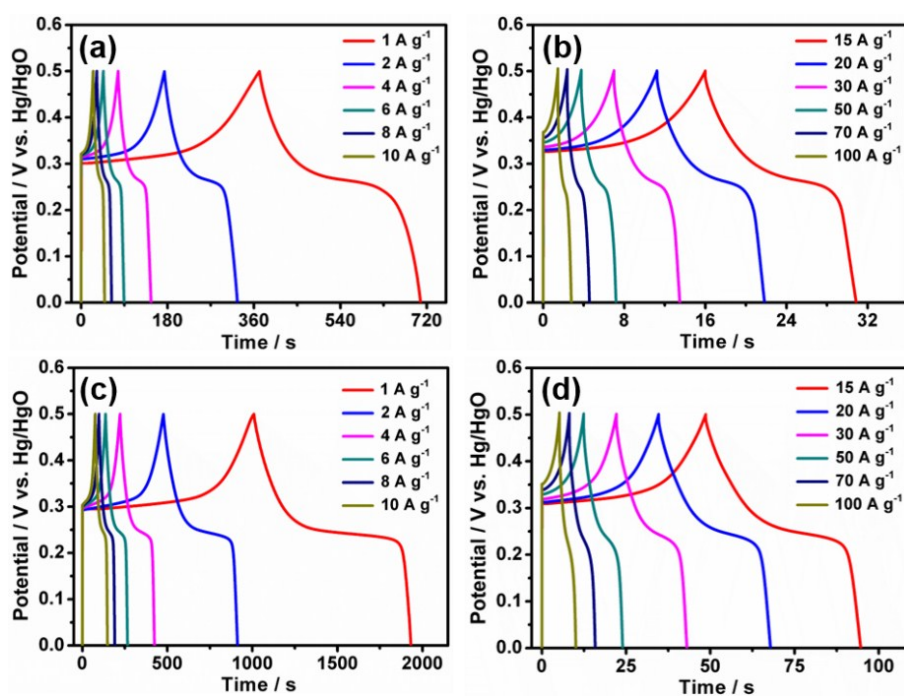

**Fig. S8** Electrochemical performance of the samples measured in 6 M KOH electrolyte: charge/discharge curves of (a, b) CC-LDH and (c, d) CC-NC-LDH hybrid electrodes at different current densities ranging from 1 to 10 A g<sup>-1</sup> and 15 to 100 A g<sup>-1</sup>.

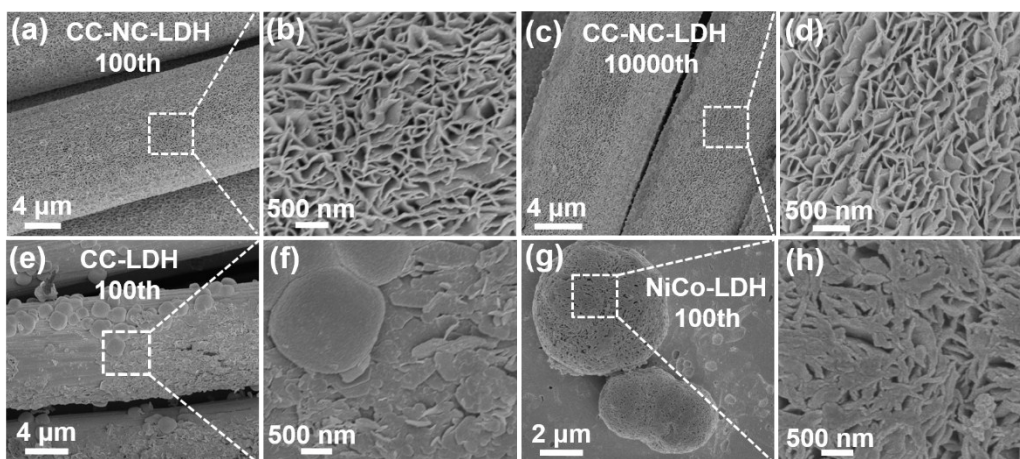

**Fig. S9** Typical FE-SEM images of the CC-NC-LDH hybrids after (a, b) 100 cycles and (c, d) 10000 cycles at a current density of  $10 \text{ A g}^{-1}$ ; (e, f) CC-LDH and (g, h) pristine NiCo-LDH after 100 cycles at a current density of  $10 \text{ A g}^{-1}$ .

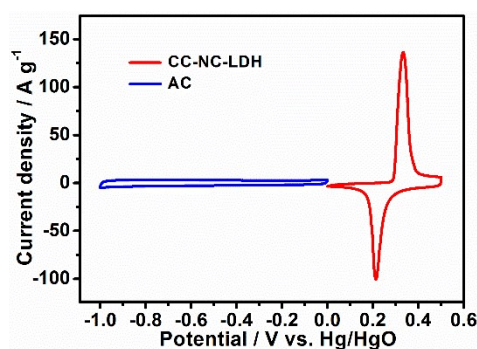

**Fig. S10** CV curves of the AC and CC-NC-LDH hybrid electrodes at a scan rate of  $10 \text{ mV s}^{-1}$ .

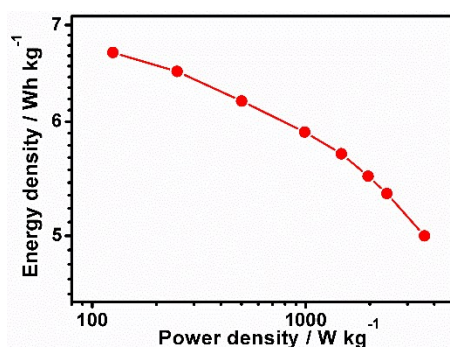

**Fig. S11** Ragone plot related to energy and power density of the AC//AC symmetric supercapacitors, in which an energy density of ca.  $6.7 \text{ Wh kg}^{-1}$  is delivered at a power density of  $125 \text{ W kg}^{-1}$ , and the energy density of  $5 \text{ Wh kg}^{-1}$  is achieved at a power density of  $3.6 \text{ kW kg}^{-1}$ .



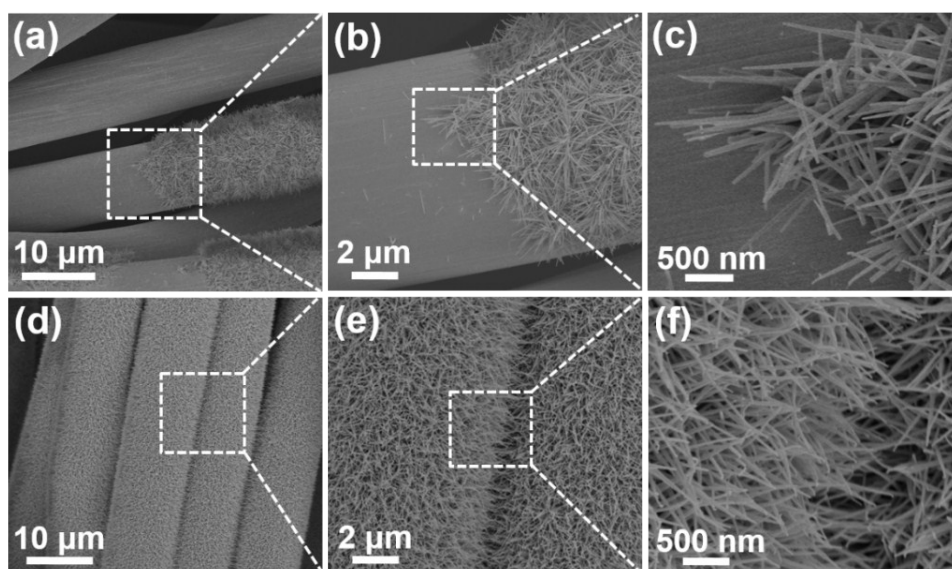

**Fig. S12** Typical FE-SEM images of (a, b, c) the CC-CH and (d, e, f) CC-NC-CH hybrids.

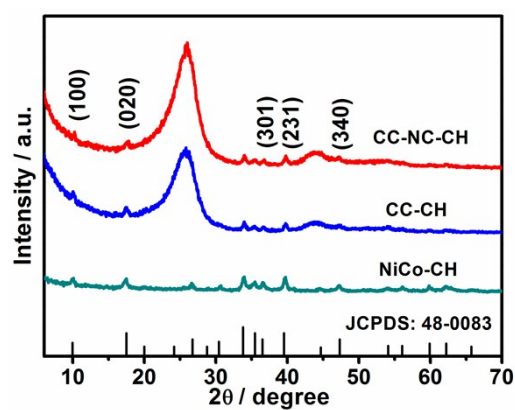

**Fig. S13** Typical XRD patterns of the as-made CC-NC-CH, CC-CH and pristine NiCo-CH.

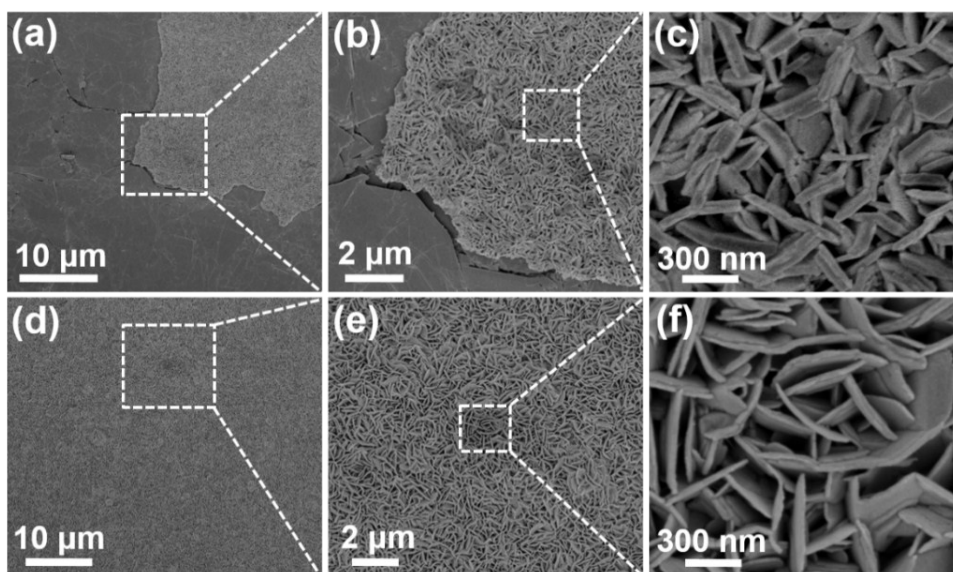

**Fig. S14** Typical FE-SEM images of (a, b, c) the G-LDH and (d, e, f) G-NC-LDH nanohybrids.

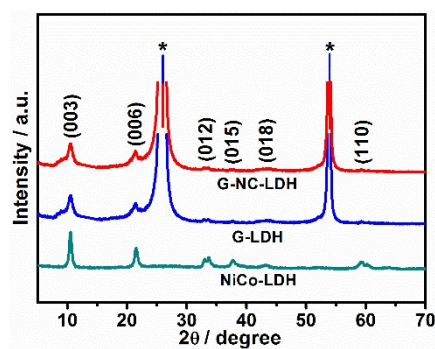

**Fig. S15** Typical XRD patterns of the as-made G-NC-LDH, G-LDH and pristine NiCo-LDH.

**Table S1** The relative contents of elements in CC-NC sample derived from XPS data.

| CC-NC | C     | O     | N    |
|-------|-------|-------|------|
| at. % | 87.19 | 11.74 | 1.07 |

**Table S2** The Ni and Co contents in CC-NC-LDH, CC-LDH and NiCo-LDH samples analysed by ICP technique.

| Sample    | Ni (wt%) | Co (wt%) |
|-----------|----------|----------|
| CC-NC-LDH | 1.501    | 0.499    |
| CC-LDH    | 1.499    | 0.498    |
| NiCo-LDH  | 1.503    | 0.501    |

**Table S3** The atomic fractions of the nitrogen bonding states calculated from the XPS N 1s peaks of CC-NC and CC-NC-LDH nanohybrids.

| Sample    | pyrrolic-N (%) | graphitic-N (%) |
|-----------|----------------|-----------------|
| CC-NC     | 78.2           | 21.8            |
| CC-NC-LDH | 70.9           | 29.1            |



**Table S4** A comparison of electrochemical performance for CC-NC-LDH hybrid electrodes with some representative Ni-Co oxides or hydroxides in literature, all in electrolyte of 6 M KOH.

| Sample                                                                                    | System voltage (V) | Electrochemical performance                     |                              |                        | reference |
|-------------------------------------------------------------------------------------------|--------------------|-------------------------------------------------|------------------------------|------------------------|-----------|
|                                                                                           |                    | Specific capacitance                            | Capacitance retention        | Stability              |           |
| CC-NC-LDH                                                                                 | 0.50 V vs. Hg/HgO  | 1817 F g <sup>-1</sup> at 1 A g <sup>-1</sup>   | 60% at 100 A g <sup>-1</sup> | 88% after 10000 cycles | This work |
| Co <sub>3</sub> O <sub>4</sub> /NiCo <sub>2</sub> O <sub>4</sub> double-shelled nanocages | 0.42 V vs. SCE     | 972 F g <sup>-1</sup> at 5 A g <sup>-1</sup>    | 63% at 50 A g <sup>-1</sup>  | 92% after 12000 cycles | [1]       |
| CoAl-LDH/graphene                                                                         | 0.40 V vs. SCE     | 1043 F g <sup>-1</sup> at 1 A g <sup>-1</sup>   | 87% at 20 A g <sup>-1</sup>  | 88% after 3000 cycles  | [2]       |
| NiCoAl-LDH /NiCo-CH nanowire                                                              | 0.48 V vs. Hg/HgO  | 1297 F g <sup>-1</sup> at 1 A g <sup>-1</sup>   | 59% at 30 A g <sup>-1</sup>  | --                     | [3]       |
| NiCo <sub>2</sub> O <sub>4</sub> @Au nanotubes                                            | 0.45 V vs. SCE     | 1390 F g <sup>-1</sup> at 5 A g <sup>-1</sup>   | 38% at 100 A g <sup>-1</sup> | 85% after 10000 cycles | [4]       |
| NiCo <sub>2</sub> O <sub>4</sub> microtubes                                               | 0.53 V vs. SCE     | 1387.9 F g <sup>-1</sup> at 2 A g <sup>-1</sup> | 38% at 30 A g <sup>-1</sup>  | 89% after 12000 cycles | [5]       |
| NiCo <sub>2</sub> O <sub>4</sub> hollow spheres                                           | 0.50 V vs. SCE     | 1141 F g <sup>-1</sup> at 1 A g <sup>-1</sup>   | 69% at 15 A g <sup>-1</sup>  | 95% after 4000 cycles  | [6]       |
| aCF-NiCo-double hydroxide                                                                 | 0.65 V vs. Hg/HgO  | 1281 F g <sup>-1</sup> at 0.5 A g <sup>-1</sup> | 70% at 20 A g <sup>-1</sup>  | --                     | [7]       |
| NiCo-CH nanowire-Graphene-CNT                                                             | 0.48 V vs. Hg/HgO  | 1146 F g <sup>-1</sup> at 1 A g <sup>-1</sup>   | 40% at 100 A g <sup>-1</sup> | 95% after 2500 cycles  | [8]       |

a) 3E refers to three electrode test.

## Reference

- [1] H. Hu, B. Y. Guan, B. Y. Xia and X. W. Lou, *J. Am. Chem. Soc.*, 2015, **137**, 5590-5595.
- [2] X. Wu , L. Jiang , C. Long , T. Wei and Z. Fan, *Adv. Funct. Mater.*, 2015, **25**, 1648-1655.
- [3] J. Yang , C. Yu , X. Fan and J. Qiu, *Adv. Energy Mater.*, 2014, **4**, 1400761.
- [4] J. Zhu, Z. Xu and B. Lu, *Nano Energy*, 2014, **7**, 114-123.
- [5] F. Ma, L. Yu, C. Xu and X. W. Lou, *Energy Environ. Sci.*, 2016, **9**, 862-866.
- [6] L. Shen, L. Yu, X. Y. Yu, X. Zhang and X. W. Lou, *Angew. Chem. Int. Ed.*, 2014, **54**, 1868-1872.

- [7] T. Li, W. Zhang, L. Zhi , H. Yu, L. Dang , F. Shi , H. Xu, F. Hu, Z. Liu, Z. Lei and J.Qiu, *Nano Energy*, 2016, **30**, 9-17.
- [8] J. Yang, C. Yu, X. Fan, C. Zhao and J. Qiu, *Adv. Funct. Mater.*, 2015, **25**, 2109-2116.
